# Supplementary material
Source: publisher site journal article supplement (https://www.kjim.org/upload/media/kjim-2017-141-suppl3.pdf)
Supplement: Supplementary file 1 [file kjim-2017-141-suppl3.pdf]

**Supplementary Table 3. Multivariable-adjusted likelihood to choose dialysis modality according to baseline comorbid conditions in incident dialysis patients aged 60 years or older**

| Baseline comorbid condition                              | Odds ratio (95% CI) <sup>a</sup> | p value |
|----------------------------------------------------------|----------------------------------|---------|
| More likely to choose PD as an initial dialysis modality |                                  |         |
| Myocardial infarction                                    | 1.77 (1.51–2.08)                 | < 0.001 |
| Congestive heart failure <sup>b</sup>                    | 1.23 (1.11–1.29)                 | < 0.001 |
| Diabetes mellitus                                        | 1.05 (0.96–1.14)                 | 0.273   |
| More likely to choose HD as an initial dialysis modality |                                  |         |
| Cancer <sup>b</sup>                                      | 1.87 (1.55–2.25)                 | < 0.001 |
| Liver disease                                            | 1.22 (1.05–1.42)                 | 0.010   |
| Cerebrovascular disease                                  | 1.20 (1.08–1.34)                 | 0.001   |
| MA (vs. NHI)                                             | 1.12 (0.98–1.29)                 | 0.090   |
| Sex, male (vs. female) <sup>b</sup>                      | 1.09 (1.00–1.18)                 | 0.041   |
| Peptic ulcer disease                                     | 1.07 (0.95–1.19)                 | 0.272   |
| Chronic pulmonary disease                                | 1.05 (0.95–1.17)                 | 0.315   |
| Age (per 1-year increase)                                | 1.04 (1.03–1.05)                 | < 0.001 |
| Peripheral artery disease                                | 1.02 (0.87–1.19)                 | 0.812   |

CI, confidence interval; PD, peritoneal dialysis; HD, hemodialysis; MA, Medical Aid; NHI, National Health Insurance.

<sup>a</sup>Adjusted odds ratios and 95% CIs by multivariable-adjusted logistic regression analysis for choosing each dialysis modality.

<sup>b</sup>The pattern of choice for dialysis modality in this condition consequently increased the mortality risk.
